# Supplementary material
Source: PubMed Central journal article supplement (PMC6463920)
Supplement: fj.201802413R.sd1.pdf [file fj.201802413R.sd1.pdf]

## Supplementary Information

**Spaceflight/Microgravity inhibits the proliferation of hematopoietic stem cells by decreasing Kit-Ras/cAMP-CREB pathway networks as evidenced by RNA-Seq assays**

Peng Wang<sup>1, \*</sup>, Hongling Tian<sup>1, \*</sup>, Jiayu Zhang<sup>1, 2, \*</sup>, Juanjuan Qian<sup>1</sup>, Ling Li<sup>1</sup>, Lu Shi<sup>1, #</sup>,  
and Yong Zhao<sup>1, 2, 3, #</sup>

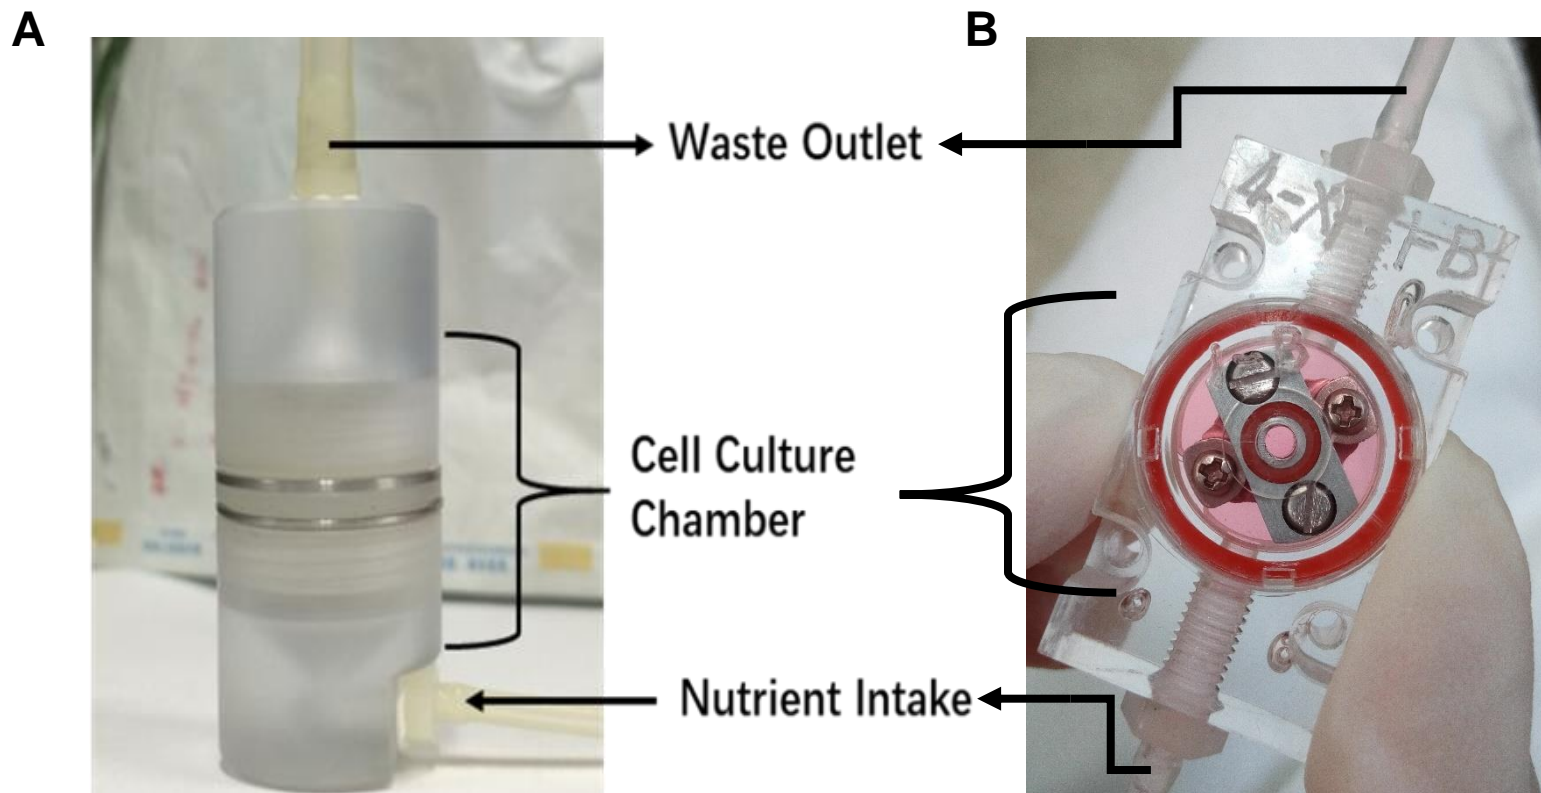

**Supplementary Figure 1. The culture vessel of HSPCs on SJ-10 satellite and Tianzhou-1 cargo ship.**

**A**, The culture vessel of HSPCs on SJ-10 satellite. **B**, The culture vessel of HSPCs on Tianzhou-1 cargo ship.

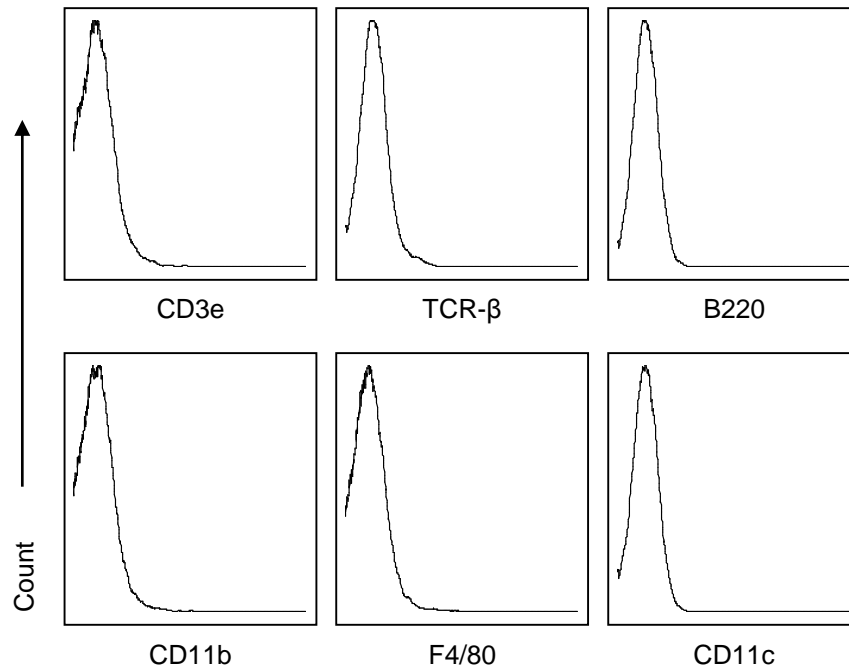

**Supplementary Figure 2. The expressions of lineage specific makers in sorted HSPCs from bone marrow, including CD3 $\epsilon$ , TCR- $\beta$ , B220, CD11b, F4/80 and CD11c.**

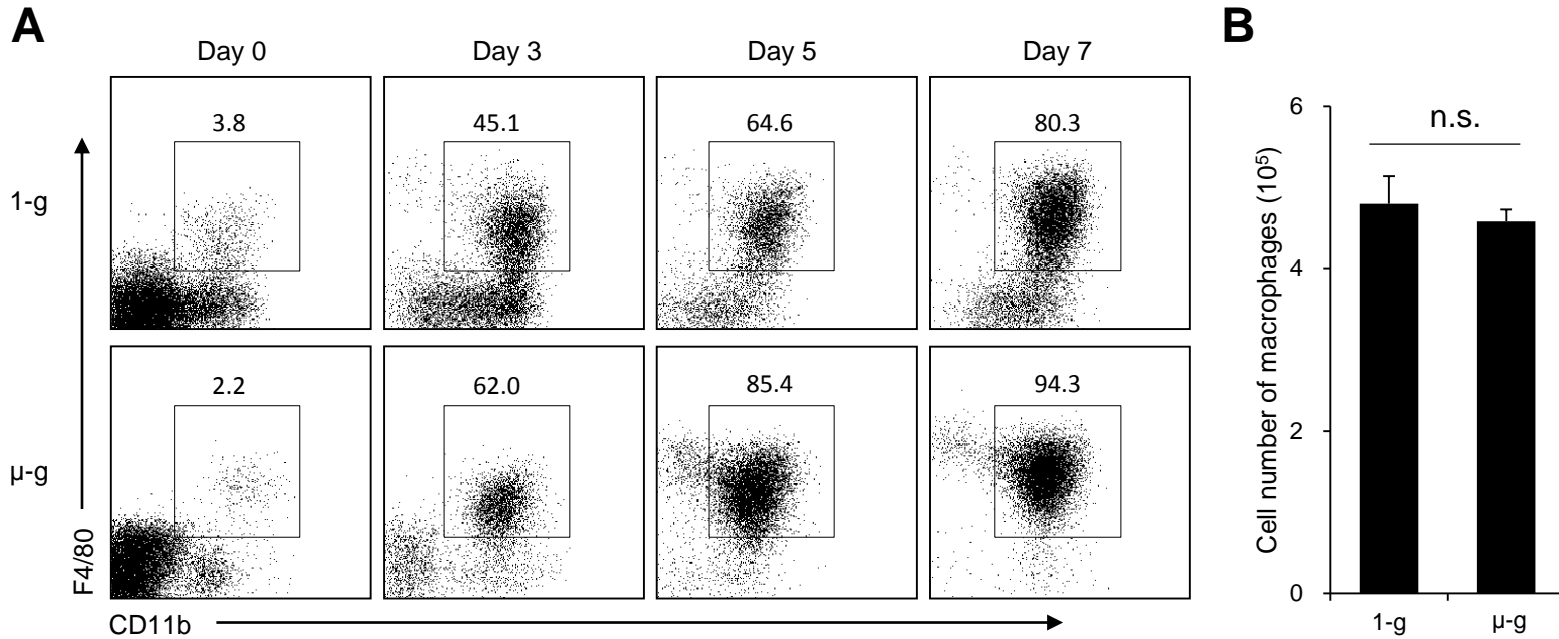

**Supplementary Figure 3. There was no difference in directed differentiation of HSPCs into macrophages after culturing in normal ground control and simulated microgravity conditions for 12 days.**

**A**, Typical FACS plot of macrophages expressing CD11b and F4/80 for HSPCs simulated by M-CSF for 0, 3, 5, 7 days under different gravity conditions. **B**, The number of macrophages differentiated by HSPCs after seven days under different gravity conditions. 1-g: Normal gravity. μ-g: Simulated microgravity.

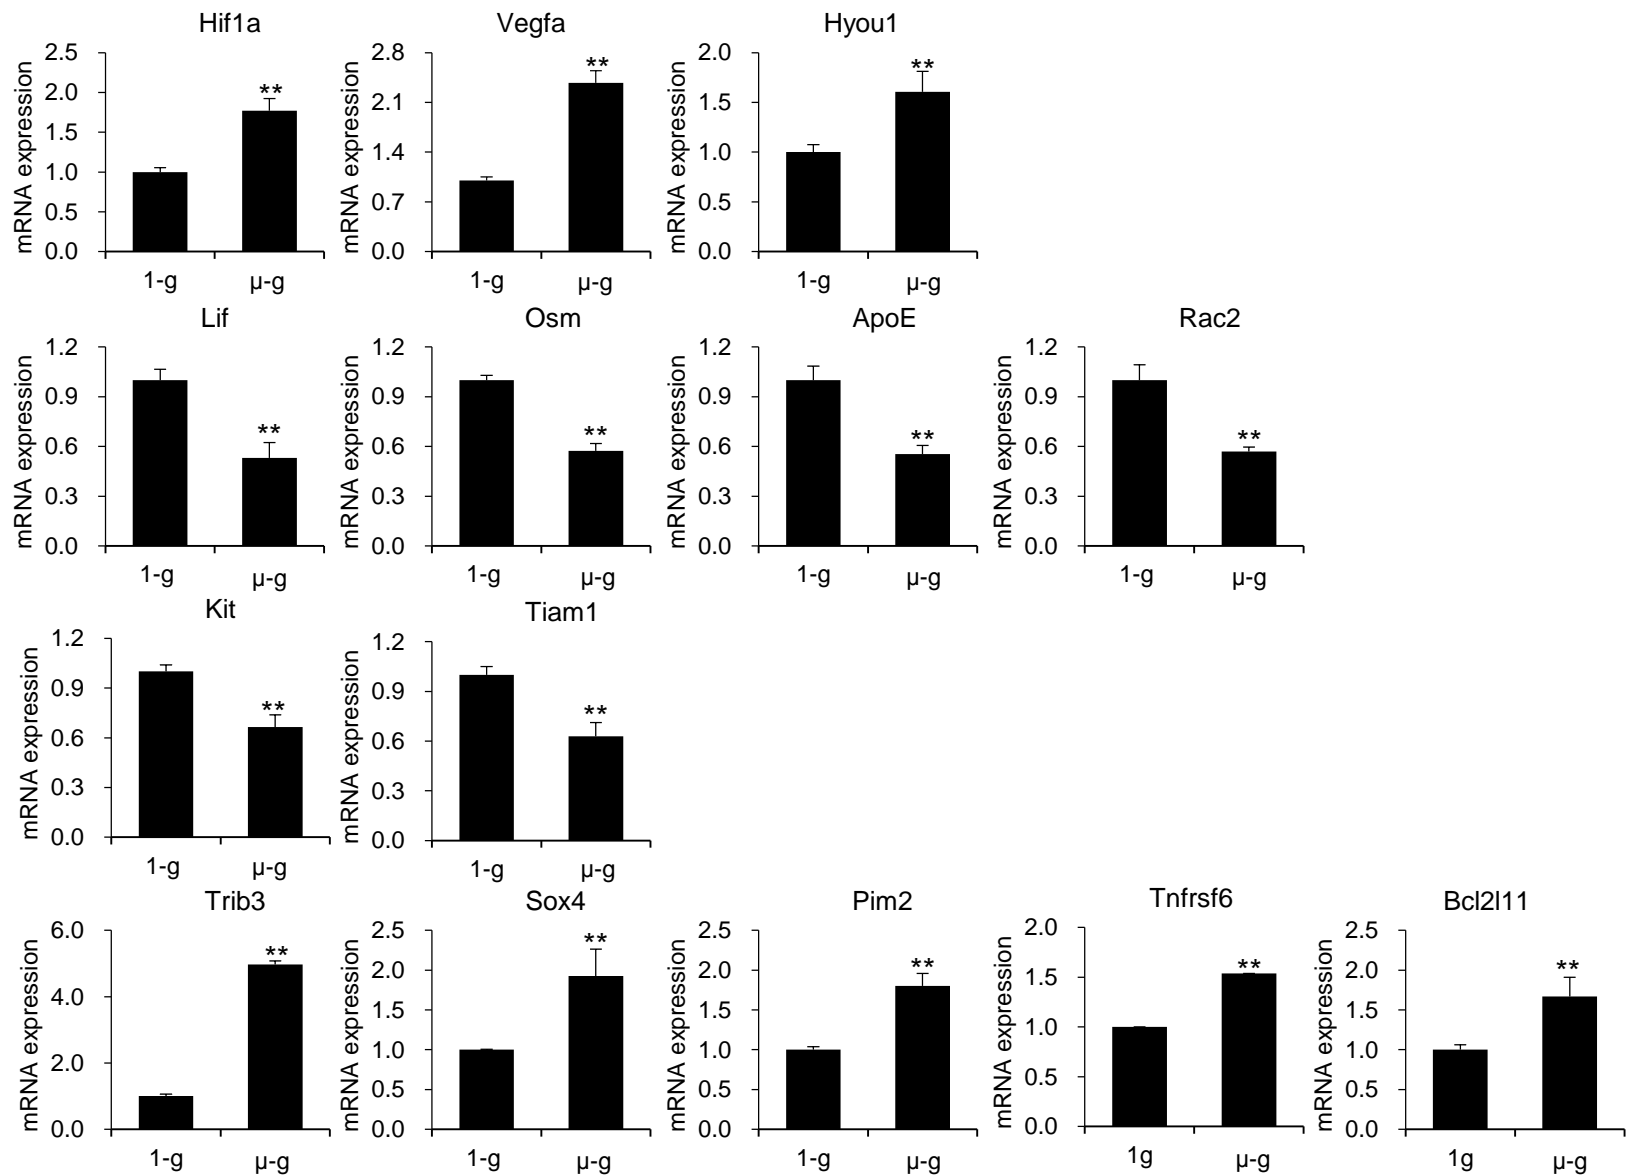

**Supplementary Figure 4. The mRNA expressions of genes associated with processes of hypoxia stress, cell proliferation and cell apoptosis.**

These genes include *Hif1 $\alpha$* , *Vegfa*, *Lif*, *Osm*, *ApoE*, *Rac2*, *Kit*, *Tiam1*, *Trib3*, *Sox4*, *Pim2*, *Tnfrsf6* and *Bcl2l11*.

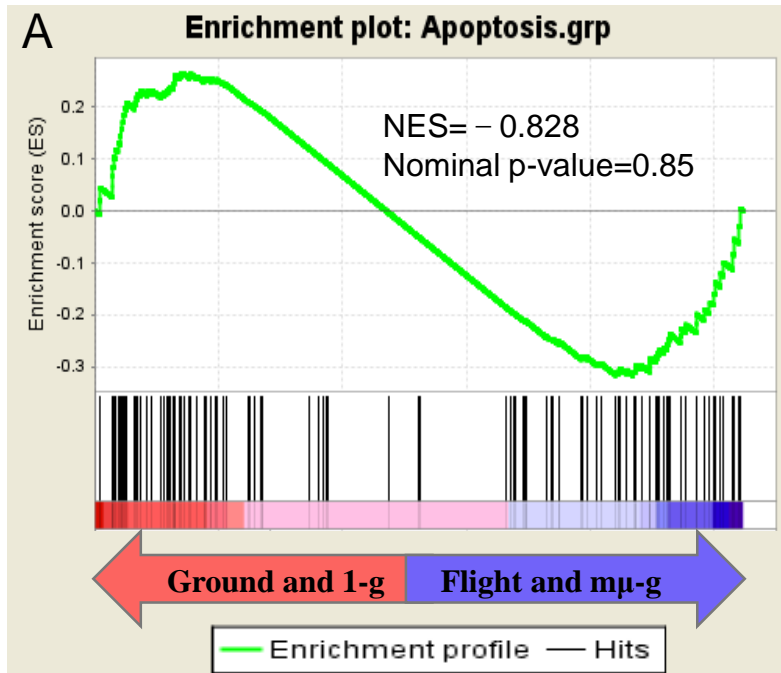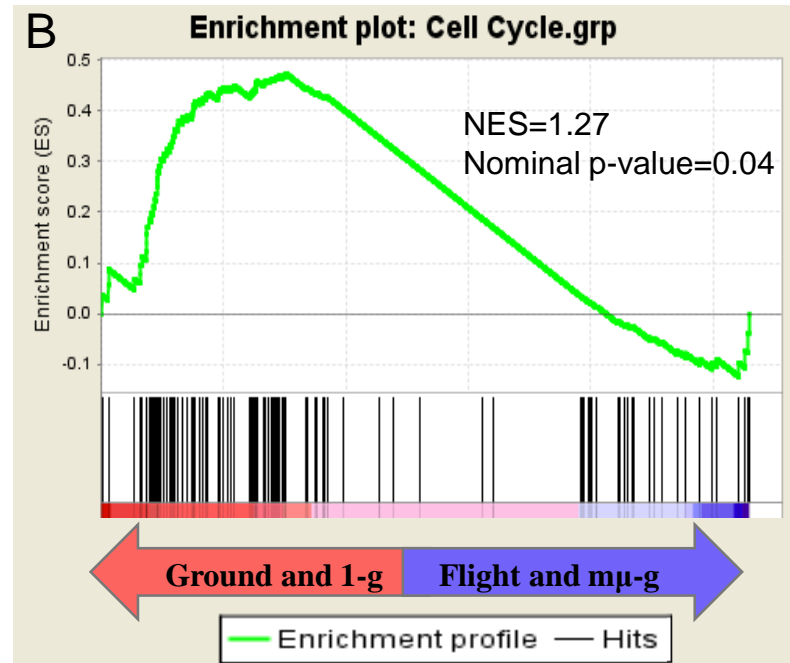

**Supplementary Figure 5. GSEA analysis of DEGs between the control and microgravity-treated samples (including spaceflight and simulated microgravity experiments).**

**A**, Apoptosis pathway; **B**, Cell cycle pathway. Profile of the running Enrichment Score and positions of gene set members on the ranked list of genes are shown. NES, normalized enrichment score.

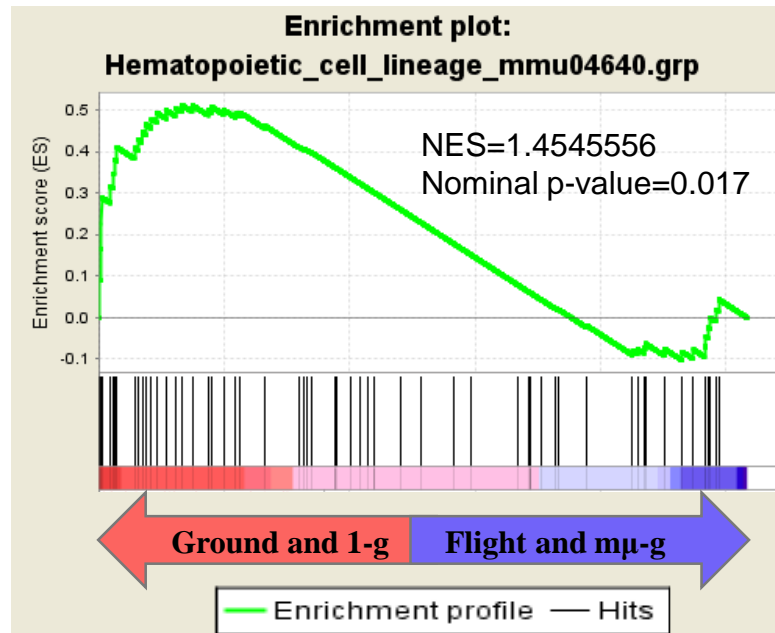

**Supplementary Figure 6. GSEA plot: Hematopoietic cell lineage pathway (mmu04640) analysis between the control and microgravity-treated samples.**

Profile of the running Enrichment Score and positions of gene set members on the ranked list of genes are shown. NES, normalized enrichment score.
